# Supplementary material
Source: PubMed Central journal article supplement (PMC3234874)
Supplement: supp_M111.306191_jbc.M111.306191-1.pdf [file supp_M111.306191_jbc.M111.306191-1.pdf]

## Legends for Supporting information, Figures

**Figure S1. NLRP7 expression in different hematopoietic cell lines.** (A) Immunofluorescence photos showing NLRP7 expression in BJAB and THP1 cells. DNA was counterstained with DAPI (blue). (B) Different Cell lines were seeded in supplemented RPMI 1640, collected, centrifuged, and the pellets lyzed. Immunoblots of whole cell lysates showing NLRP7 expression in hematopoietic cell lines of different origins.

**Figure S2. Missense mutations in the NLRP7 NACHT domain do not alter significantly the inhibitory function of the protein.** HEK293 cells were transfected simultaneously with expression vectors encoding IL1B (150 ng), Flag-caspase-1 (15 ng) and Flag-wtNLRP7 or mutant NLRP7 (100 ng) expression vectors. Immunoblots of whole cell lysates show that missense mutations in the NACHT domain do not affect the inhibitory function of NLRP7. All NLRP7 mutants decrease IL1B production to the same extent as the wild-type protein.

**Figure S3. NLRP7 expression in HEK293 cells transfected with vector carrying wild type flag-NLRP7 and revealed with Flag antibody.** Note the presence of the NLRP7 signal in one pole of the cells in three of the five shown cells.
