# Supplementary material
Source: PubMed Central journal article supplement (PMC3234874)
Supplement: supp_M111.306191_jbc.M111.306191-5.pdf [file supp_M111.306191_jbc.M111.306191-5.pdf]

**Table 1**  
**Mutation analysis and reproductive outcomes of patients with *NLRP7* mutations**

| Family ID                          | Patient ID | NLRP7                         | Reproductive Outcomes                                               | Reference             |
|------------------------------------|------------|-------------------------------|---------------------------------------------------------------------|-----------------------|
| <i>Patients with Mutations</i>     |            |                               |                                                                     |                       |
| MoLb1                              | 4          | p.[G118X;V319I];[G118X;V319I] | LB <sup>IUGR</sup> , SB, END, PHM, 2 HM, CHM, SA, PHM               | Murdoch et al., 2006  |
| MoGe2                              | II-3       | p.[R693W];[R693W]             | CHM, CHM, CHM, HM                                                   | Murdoch et al., 2006  |
| MoCa57                             | 428        | p.[V319I;G487E];[V319I;C399Y] | SB (21w), BO, twin (fetus+CHM), SA, SA, LB (28w) with malformations | Deveault et al., 2009 |
| MoCa94                             | 636        | p.[A719V];[=]                 | EFL, NP, EFL, SA, EFL, PHM, NP                                      | Deveault et al., 2009 |
| MoBa169                            | 723        | p.[G380R];[=]                 | SA, SB (28w), HM                                                    | Messaed et al., 2011  |
| MoCa245                            | 890        | p.[A481T; A719V]              | twin (EP+tubal), BO, SA, SA, Pregnant                               | Messaed et al., 2011  |
| <i>Patients with Rare Variants</i> |            |                               |                                                                     |                       |
| MoCa247                            | 896        | p.[V319I(;K511R)]             | TA (fetus with malformations), NP, CHM                              | This study            |
| MoCa305                            | 993        | p.[G487E];[G487E]             | SA, HM-GTD, SA                                                      | This study            |

Amino acid numbering of mutations and variants uses cDNA numbering with +1 corresponding to the A of the ATG translation initiation codon in the reference sequence, NM\_001127255.1. LB, stands for live birth; IUGR, for intra-uterine growth restriction; SB, for stillbirth; END, for early neonatal death; PHM, for partial hydatidiform mole (HM); CHM, for complete HM; SA, for spontaneous abortion; BO, for blighted ovum; EP, ectopic pregnancy; EFL, for early fetal loss before a pregnancy test was performed; w, for weeks. Mutations that are not present in the general population are in red and rare variants found at lower frequencies in the general population and are associated with reproductive wastage are in blue. Common variants are in black.
