# Supplementary material
Source: PubMed Central journal article supplement (PMC3234874)

**Figure S1**

**A**

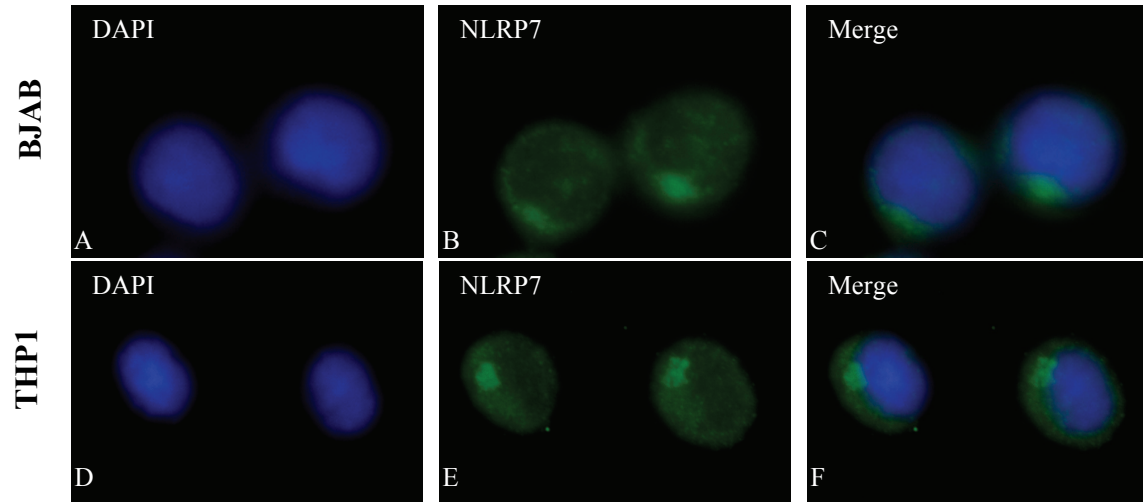

**B**

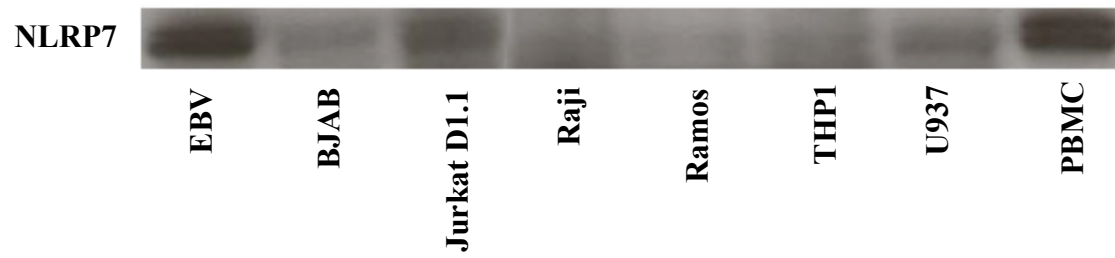

Supplement: supp_M111.306191_jbc.M111.306191-2.pdf [file supp_M111.306191_jbc.M111.306191-2.pdf]

**Figure S2**

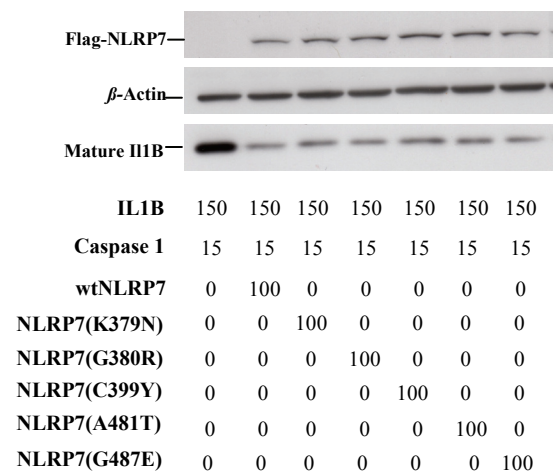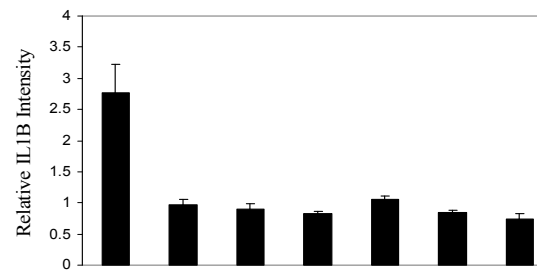

|                     |     |     |     |     |     |     |     |
|---------------------|-----|-----|-----|-----|-----|-----|-----|
| <b>IL1B</b>         | 150 | 150 | 150 | 150 | 150 | 150 | 150 |
| <b>Caspase 1</b>    | 15  | 15  | 15  | 15  | 15  | 15  | 15  |
| <b>wtNLRP7</b>      | 0   | 100 | 0   | 0   | 0   | 0   | 0   |
| <b>NLRP7(K379N)</b> | 0   | 0   | 100 | 0   | 0   | 0   | 0   |
| <b>NLRP7(G380R)</b> | 0   | 0   | 0   | 100 | 0   | 0   | 0   |
| <b>NLRP7(C399Y)</b> | 0   | 0   | 0   | 0   | 100 | 0   | 0   |
| <b>NLRP7(A481T)</b> | 0   | 0   | 0   | 0   | 0   | 100 | 0   |
| <b>NLRP7(G487E)</b> | 0   | 0   | 0   | 0   | 0   | 0   | 100 |

Supplement: supp_M111.306191_jbc.M111.306191-3.pdf [file supp_M111.306191_jbc.M111.306191-3.pdf]

Figure S3

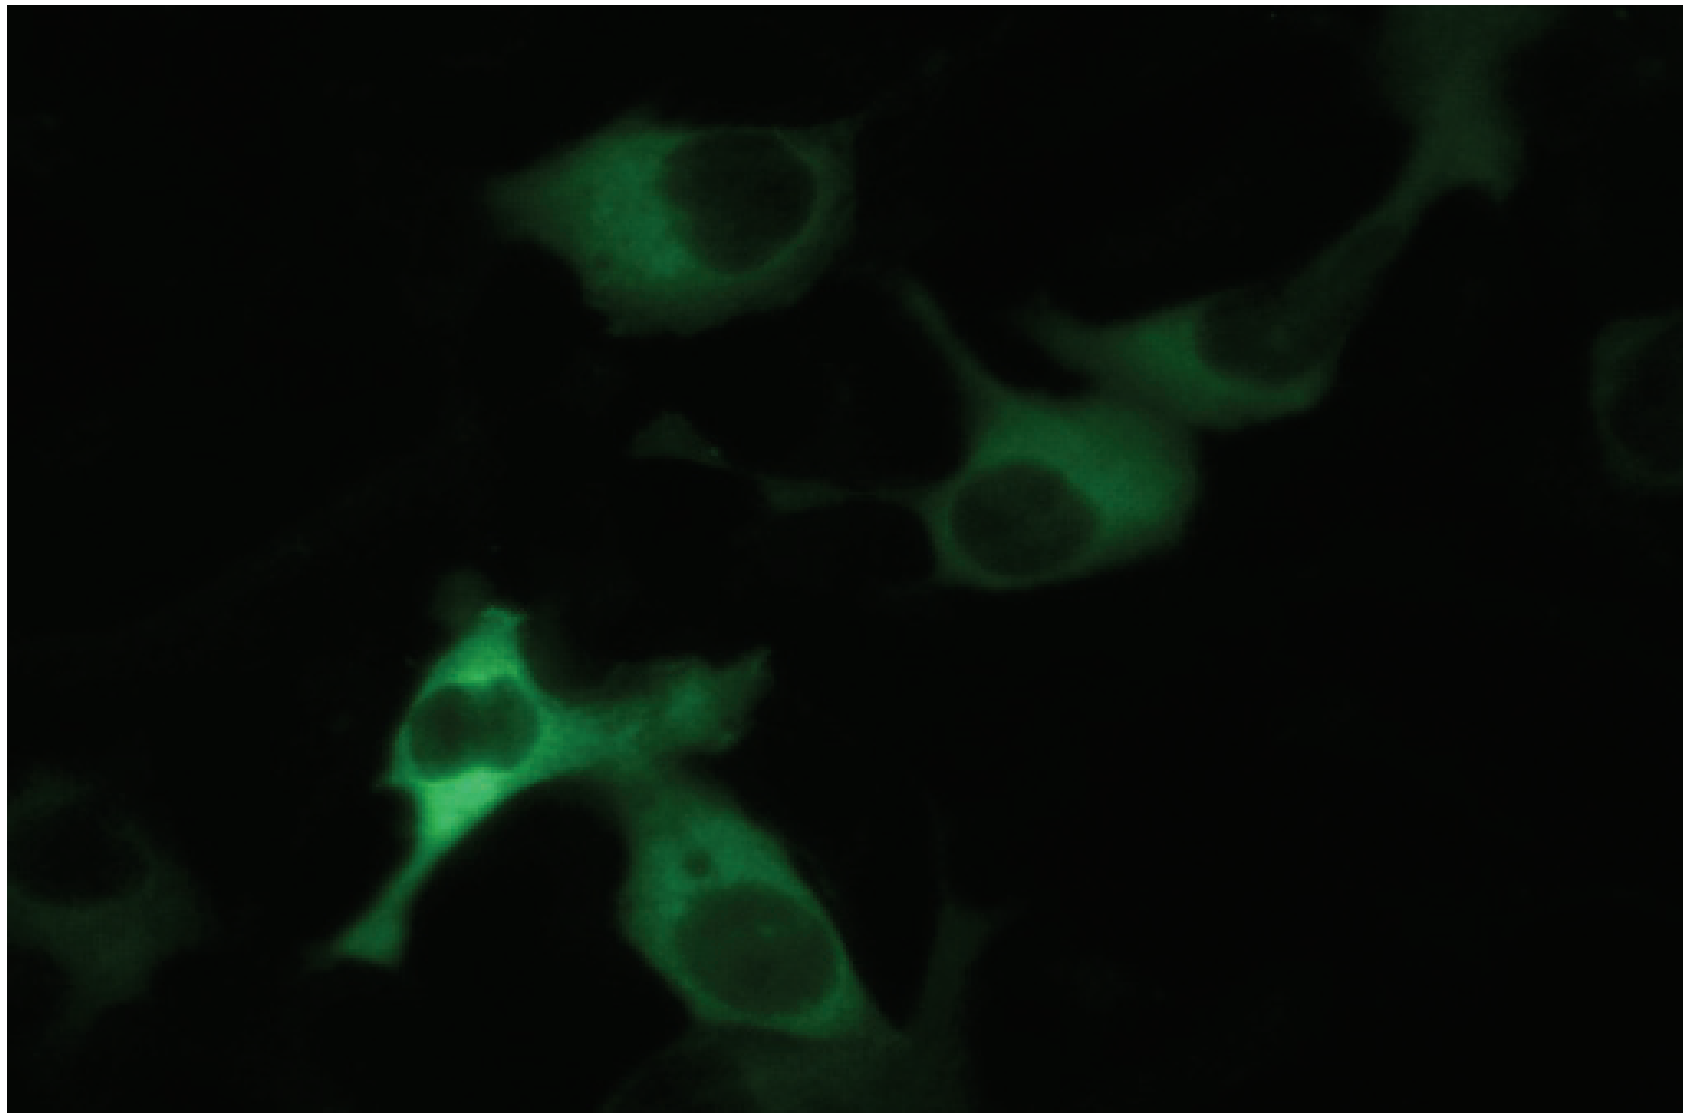

Supplement: supp_M111.306191_jbc.M111.306191-4.pdf [file supp_M111.306191_jbc.M111.306191-4.pdf]
